# Supplementary material
Source: ML conference proceedings conference paper supplement (https://openreview.net/forum?id=xtADRDRsM2)
Supplement: supplementary_material [file attachment]

---

# Supplement

---

Anonymous Author(s)

Affiliation

Address

email

1 The equation numbers and result references without prefixes correspond directly to those presented  
2 in the main paper. Throughout this supplementary material, labels are prefixed with “S” to facilitate  
3 easy cross-referencing with the corresponding sections in this document.

4 In this supplement, we expand on material from the main paper, addressing each point as follows:

- 5 1. An in-depth comparison with related work is covered in Section S1.
- 6 2. Section S2 presents the datasets and details of the attackers, and includes additional experi-  
7 mental results, inference time, and model size to reinforce our model’s effectiveness.
- 8 3. Theoretical proofs supporting assertions made in the main paper are presented in Section S3.
- 9 4. A concrete example to illustrate our claims is provided in Section Section S4.
- 10 5. The complete summary of the algorithm can be found in Section Section S5.
- 11 6. Lastly, we address the limitations of our work and discuss its broader impact.

## 12 S1 Related Work

13 In what follows, we briefly review a few concepts closely related to our work.

14 **Graph Adversarial Attacks and Defenses.** In *modification attacks*, adversaries can perturb a graph’s  
15 topology by adding or removing edges [1–9]. To improve the modification attack performance,  
16 adversaries are also permitted to perturb node attributes [4–7, 10, 11]. In *injection attacks*, adversaries  
17 can only inject malicious nodes into the original graph [12–15] while the edges and nodes inside  
18 the original graph are not allowed to be perturbed. For *defense methods* against adversarial attacks,  
19 multiple robust GNN models have been proposed. Examples include RobustGCN [16], GRAND  
20 [17], ProGNN [18], GLNN [19], GAUGM [20], STABLE [21] and RWL-GNN [22]. In addition,  
21 preprocessing-based defenders including GNN-SVD [23] and GNNGuard [24] may help to improve  
22 GNN robustness.

23 *In this paper, we use different attacks to test GNNs robustness. We compare graph neural flows with*  
24 *different stability settings with the above-mentioned defense methods as robustness benchmarks.*

25 **Stable Graph Neural Flow Networks.** While traditional GNNs perform message passing on a  
26 simple, discrete and flat space, graph neural flows model the message passing as a continuous  
27 diffusion process that occurs on a smooth manifold. GRAND [25] and GRAND++ [26] use heat  
28 diffusion to achieve feature information exchange. BLEND [27] exploits the Beltrami diffusion where  
29 the nodes’ positional information is updated along with their features. GraphCON [28] adopts the  
30 coupled oscillator model that preserves the graph’s Dirichlet energy over time and thus mitigates  
31 the oversmoothing problem. In general, [29] shows that graph neural PDEs are Lyapunov stable and  
32 exhibit stronger robustness against graph topology perturbation than traditional GNNs.

33 *While most of the above-mentioned graph neural flows are Lyapunov stable, whether the notion of*  
34 *Lyapunov stability leads to better adversarial robustness is an open question. In this paper, we argue*  
35 *that Lyapunov stability does not necessarily imply adversarial robustness.*

**Hamiltonian Neural Networks.** Hamiltonian equations have been applied to conserve an energy-like quantity in (graph) neural networks. The references [30–32] train a neural network to infer the Hamiltonian dynamics of a physical system, where Hamiltonian equations are solved using neural ODE solvers. In [33], the authors propose to learn a Hamiltonian function of the system by a neural network to capture the dynamics of physical systems from observed trajectories. They shows that the network performs well on noisy and complex systems such as a spring-chain system. To forecast dynamics, the work [34] use neural networks that incorporate Hamiltonian dynamics to efficiently learn phase space orbits and demonstrate the effectiveness of Hamiltonian neural networks on several dynamics benchmarks. The paper [35] builds a Hamiltonian-inspired neural ODE to stabilize the gradients so as to avoid gradient vanishing and gradient exploding.

*In this paper, inspired by existing Hamiltonian neural networks, we introduce several energy-conservative graph neural flows. We are neither simulating a physical system nor forecasting a forecast the dynamics for a physical problem. Instead, we combine the Hamiltonian mechanics concept with graph neural networks to develop a new robust GNN.*

## S2 More Experiments

### S2.1 Data and Attackers

The datasets and attack budgets utilized in Table 2 and Table 3 are outlined in Table S1 and Table S2, respectively. These datasets span various domains and scales, thereby providing a diverse base for our study. The adopted attack budget aligns consistently with the specifications set out in the paper [36].

Table S1: Dataset Details

| Dataset    | # Nodes | # Edges | # Features | # Classes |
|------------|---------|---------|------------|-----------|
| Cora       | 2708    | 5429    | 1433       | 7         |
| Citeseer   | 3327    | 4732    | 3703       | 6         |
| PubMed     | 19717   | 44338   | 500        | 3         |
| Coauthor   | 18,333  | 81,894  | 6,805      | 15        |
| Computers  | 13,752  | 245,861 | 767        | 10        |
| Ogbn-Arxiv | 169343  | 1166243 | 128        | 40        |

Table S2: Attacks’ budgets for GIA. \* refers to targeted GIA.

| Dataset     | max # Nodes | max # Edges |
|-------------|-------------|-------------|
| Cora        | 60          | 20          |
| Citeseer    | 90          | 10          |
| PubMed      | 200         | 100         |
| Coauthor    | 300         | 150         |
| Ogbn-Arxiv* | 120         | 100         |
| Computers*  | 100         | 150         |

### S2.2 Implementation Details

The raw node features are compressed to a fixed dimension, such as 64, using a fully connected (FC) layer to generate the initial features  $q(0)$  in (9). At time  $t = 0$ ,  $p(0)$  and  $q(0)$  are initialized identically. For  $t > 0$ , both  $q(t)$  and  $p(t)$  undergo updates using a graph ODE. The ODE is solved using the solver from [37]. It is observed that different solvers deliver comparable performance in terms of clean accuracy. However, to mitigate computational expense, the Euler solver is employed in our experiments, with an ablation study on different solvers provided for further insight. The integral time  $T$  acts as a hyperparameter in our model. Interestingly, the performance of the model exhibits minimal sensitivity to this time  $T$ . For all datasets, we establish the time  $T$  as 3 and maintain a fixed step size of 1. This setup aligns with a fair comparison to three-layer GNNs.

All the baseline models presented in Table 2 and Table 3 are implemented based on the original work of [36]. The baseline model results in Table 4 are directly extracted from the paper [38]. This is done as we employ the same clean and perturbed graph datasets provided in their research [38].

Our experiment code is developed based on the following repositories:

- <https://github.com/tk-rusch/GraphCON>
- <https://github.com/twitter-research/graph-neural-pde>
- <https://github.com/LFhase/GIA-HAO>
- <https://github.com/ChandlerBang/Pro-GNN>

### 74 S2.3 White-box Attack

75 In our main study, we utilized black-box attacks. Now, we extend our experiments to incorporate  
76 white-box, injection, and evasion attacks. In the context of white-box attacks, the adversaries have  
77 full access to the target model, enabling them to directly attack the target model to generate a  
78 perturbed graph. This represents a significantly more potent form of attack than the black-box variant.  
79 Moreover, we execute inductive learning tasks the same as Table 2, with the corresponding results  
80 reported in Table S3. We observe that, under white-box attack conditions, all other baseline models  
81 exhibit severely reduced performance, essentially collapsing across all datasets. The classification  
82 accuracy of the HANG model experiences a slight decline on the Cora, Citeseer, and Pubmed  
83 datasets. However, its performance remains substantially superior to other diffusion models or GNN  
84 models. Intriguingly, our HANG-quad model remains virtually unaffected by the white-box attacks,  
85 maintaining a performance level similar to that observed under black-box attacks. This observation  
86 underscores the robustness of HANG-quad and reiterates the critical role that the energy conservation  
87 property plays in fortifying the model against adversarial attacks.

Table S3: Node classification accuracy (%) on graph **injection, evasion, non-targeted, white-box** attack in **inductive** learning. The best and the second-best result for each criterion are highlighted in **red** and **blue** respectively.

| Dataset    | Attack       | HANG              | HANG-quad         | GraphCON          | GraphCurv  | GRAND             | GAT               | GraphSAGE  | GCN               |
|------------|--------------|-------------------|-------------------|-------------------|------------|-------------------|-------------------|------------|-------------------|
| Cora       | <i>clean</i> | 87.13±0.86        | 79.68±0.62        | 86.27±0.51        | 86.13±0.51 | 87.53±0.59        | <b>87.58±0.64</b> | 86.65±1.51 | <b>88.31±0.48</b> |
|            | PGD          | <b>67.69±3.84</b> | <b>78.04±0.91</b> | 42.09±1.74        | 37.16±1.69 | 36.02±4.09        | 30.95±8.22        | 29.79±7.56 | 35.83±0.71        |
|            | TDGIA        | <b>64.54±3.95</b> | <b>77.35±0.66</b> | 19.01±1.45        | 15.46±1.98 | 14.72±1.97        | 4.81±1.19         | 17.83±6.62 | 33.05±1.09        |
| Citeseer   | <i>clean</i> | 74.11±0.62        | 71.85±0.48        | <b>74.84±0.49</b> | 69.62±0.56 | <b>74.98±0.45</b> | 67.87±4.97        | 63.22±9.14 | 72.63±1.14        |
|            | PGD          | <b>67.54±1.52</b> | <b>72.21±0.71</b> | 42.78±1.54        | 32.24±1.21 | 38.57±1.94        | 25.87±6.69        | 29.65±4.11 | 30.69±2.33        |
|            | TDGIA        | <b>63.29±3.15</b> | <b>70.62±0.96</b> | 33.55±1.10        | 16.26±1.20 | 30.11±1.43        | 17.46±3.34        | 17.83±1.56 | 21.10±2.35        |
| CoauthorCS | <i>clean</i> | <b>96.16±0.09</b> | 95.27±0.12        | 95.10±0.12        | 93.93±0.48 | 95.08±0.12        | 92.84±0.41        | 93.0±0.39  | 93.33±0.37        |
|            | PGD          | <b>93.40±0.71</b> | <b>93.25±1.02</b> | 7.80±1.18         | 13.21±4.21 | 8.0±0.06          | 11.96±7.10        | 10.73±6.84 | 11.02±5.04        |
|            | TDGIA        | <b>93.38±0.71</b> | <b>94.12±0.43</b> | 7.35±1.61         | 10.38±1.07 | 4.53±1.33         | 1.35±0.55         | 2.89±1.65  | 3.61±1.77         |
| Pubmed     | <i>clean</i> | <b>89.93±0.27</b> | 88.10±0.33        | <b>88.78±0.46</b> | 86.97±0.37 | 88.44±0.34        | 87.41±1.73        | 88.71±0.37 | 88.46±0.20        |
|            | PGD          | <b>68.62±2.82</b> | <b>87.64±0.39</b> | 36.86±2.63        | 39.34±0.77 | 39.52±3.35        | 38.04±4.91        | 38.76±4.58 | 39.03±0.10        |
|            | TDGIA        | <b>69.56±3.16</b> | <b>87.91±0.46</b> | 31.49±1.87        | 30.15±1.30 | 36.19±7.04        | 24.43±4.10        | 38.89±0.76 | 42.64±1.41        |

### 88 S2.4 Attack Strength

89 We assess the robustness of the HANG model and its variant under varying attack strengths, with  
90 the node classification results displayed in Table S4. Our analysis reveals that the HANG model  
91 demonstrates superior robustness as the attack budget escalates. It’s noteworthy, however, that under  
92 larger attack budgets, HANG-quad may relinquish its robustness attribute in the face of PGD and Meta  
93 injection attacks. This result implies that the amalgamation of Lyapunov and Conservative stability  
94 facilitates enhanced robustness only under minor graph perturbations. On the contrary, the HANG  
95 model, which solely incorporates Conservative stability, exhibits a consistently high-performance  
96 level regardless of the increasing attack strength.

### 97 S2.5 Nettack

98 We further evaluate the robustness of our model under the targeted poisoning attack, Nettack [4].  
99 Adhering to the settings outlined in [38], we select nodes in the test set with a degree greater than  
100 10 to be the target nodes. We then vary the number of perturbations applied to each targeted node  
101 from 1 to 5, incrementing in steps of 1. It’s important to note that Nettack only involves feature  
102 perturbations. The test accuracy in Table S5 refer to the classification accuracy on the targeted nodes.  
103 As demonstrated in Table S5, our HANG-quad model exhibits exceptional resistance to Nettack,  
104 thereby underlining its superior robustness. This suggests that the combination of Lyapunov stability  
105 and energy conservative stability significantly enhances robustness in the face of graph poisoning  
106 attacks, as Lyapunov stability has been shown to offer robustness against minor feature perturbations  
107 in the input graph [29]. Furthermore, our HANG model also displays superior resilience compared  
108 to other PDE models, reinforcing the fact that the energy conservative principle contributes to its  
109 robustness.

Table S4: Node classification accuracy (%) on graph injection, evasion, non-targeted, black-box attack in **inductive** learning under various attack strength.

| Dataset  | Attack  | # nods/edges injected | HANG       | HANG-quad  | GraphCON   | GraphCurv   | GRAND      | GAT        | GraphSAGE  | GCN        |
|----------|---------|-----------------------|------------|------------|------------|-------------|------------|------------|------------|------------|
| Cora     | PGD     | 80/40                 | 75.78±3.46 | 78.41±0.71 | 33.60±2.62 | 33.74±2.84  | 34.04±1.87 | 32.83±3.51 | 26.79±6.53 | 31.31±0.06 |
|          | PGD     | 100/60                | 74.25±1.39 | 76.74±0.48 | 62.69±0.83 | 33.65±2.50  | 32.72±1.47 | 31.25±2.13 | 25.94±7.24 | 31.23±0.0  |
|          | PGD     | 120/80                | 71.01±2.60 | 70.69±1.83 | 33.46±1.95 | 34.88±3.66  | 32.21±0.83 | 31.28±0.15 | 25.57±7.28 | 31.23±0.0  |
|          | PGD     | 140/100               | 69.72±2.94 | 59.75±3.57 | 34.02±1.97 | 36.98±4.87  | 33.31±1.79 | 30.26±3.49 | 25.11±7.56 | 31.23±0.0  |
|          | PGD     | 160/120               | 68.12±2.93 | 45.06±4.77 | 33.34±2.27 | 39.78±4.15  | 33.07±1.34 | 31.28±0.15 | 24.87±7.80 | 31.23±0.0  |
|          | PGD     | 180/140               | 66.51±4.17 | 36.69±4.02 | 33.19±1.74 | 45.11±4.76  | 33.12±1.64 | 31.41±0.52 | 24.79±7.90 | 31.23±0.0  |
|          | PGD     | 200/160               | 66.01±4.10 | 29.58±5.11 | 32.99±2.40 | 50.51±3.94  | 32.18±0.89 | 31.47±0.70 | 24.74±7.96 | 31.23±0.0  |
|          | TDGIA   | 80/40                 | 79.47±2.57 | 78.48±0.54 | 21.69±1.51 | 28.70±3.18  | 22.34±2.18 | 25.33±6.27 | 25.43±3.22 | 26.51±3.36 |
|          | TDGIA   | 100/60                | 78.73±1.20 | 78.74±0.94 | 24.32±4.16 | 36.07±2.27  | 27.10±2.04 | 27.67±5.38 | 30.63±0.62 | 30.68±0.34 |
|          | TDGIA   | 120/80                | 78.48±1.91 | 78.20±0.78 | 29.22±1.91 | 36.43±2.58  | 29.06±2.24 | 29.67±6.34 | 30.37±0.41 | 31.28±0.87 |
|          | TDGIA   | 140/100               | 79.40±2.20 | 77.42±0.71 | 23.54±1.49 | 25.54±4.26  | 27.04±3.25 | 26.99±6.05 | 28.85±2.75 | 31.94±3.26 |
|          | TDGIA   | 160/120               | 79.37±1.30 | 78.05±1.23 | 24.27±3.00 | 32.40±2.37  | 24.56±2.92 | 19.74±6.83 | 29.78±1.66 | 30.09±0.88 |
|          | TDGIA   | 180/140               | 78.49±2.34 | 76.90±0.57 | 31.20±1.34 | 41.67±6.30  | 31.44±0.32 | 30.15±4.67 | 31.23±0.0  | 31.23±0.0  |
|          | TDGIA   | 200/160               | 78.85±2.22 | 76.70±1.02 | 24.94±3.18 | 34.32±1.11  | 29.37±1.49 | 24.64±6.93 | 31.07±0.34 | 31.14±0.38 |
|          | MetaGIA | 80/40                 | 74.41±2.74 | 78.10±0.71 | 34.73±3.45 | 33.58±2.74  | 32.16±1.20 | 32.16±1.71 | 29.58±3.90 | 31.28±0.10 |
|          | MetaGIA | 100/60                | 73.23±2.64 | 76.01±0.64 | 33.90±3.43 | 33.48±3.02  | 33.0±1.53  | 30.30±3.02 | 28.48±3.78 | 31.22±0.04 |
|          | MetaGIA | 120/80                | 73.63±1.86 | 18.21±7.41 | 32.91±1.47 | 47.80±4.06  | 32.79±2.59 | 31.23±0.0  | 24.76±7.93 | 31.23±0.0  |
|          | MetaGIA | 140/100               | 72.05±2.87 | 59.47±2.71 | 33.11±1.97 | 38.77±5.09  | 33.12±1.05 | 31.65±1.22 | 26.46±5.89 | 31.23±0.0  |
|          | MetaGIA | 160/120               | 70.93±2.20 | 17.78±7.89 | 33.51±2.36 | 57.77±3.18  | 32.46±1.0  | 31.42±0.60 | 24.69±8.02 | 31.23±0.0  |
|          | MetaGIA | 180/140               | 67.37±4.45 | 30.31±0.33 | 32.42±1.01 | 47.48±4.76  | 33.07±0.94 | 29.15±6.26 | 25.42±7.15 | 31.23±0.0  |
|          | MetaGIA | 200/160               | 68.44±2.71 | 16.69±6.29 | 32.68±1.38 | 64.38±1.73  | 32.52±1.04 | 28.79±7.09 | 24.69±8.02 | 31.23±0.0  |
| Citeseer | PGD     | 110/30                | 72.23±0.79 | 71.98±0.70 | 25.06±3.41 | 41.09±14.36 | 27.48±3.54 | 18.49±1.94 | 20.55±4.44 | 18.63±0.92 |
|          | PGD     | 130/50                | 71.61±0.84 | 71.44±0.72 | 22.90±4.73 | 43.05±13.60 | 26.42±6.16 | 18.33±1.75 | 19.16±2.95 | 17.85±1.66 |
|          | PGD     | 150/70                | 72.01±0.68 | 70.33±0.97 | 24.28±4.68 | 38.89±13.86 | 30.63±4.89 | 18.15±1.77 | 18.73±2.19 | 17.42±0.51 |
|          | PGD     | 170/90                | 71.22±0.67 | 67.81±1.11 | 23.79±4.70 | 26.14±4.72  | 21.49±2.54 | 19.09±2.83 | 17.51±0.41 | 17.65±0.75 |
|          | PGD     | 190/110               | 71.18±0.54 | 62.26±1.51 | 22.88±3.01 | 29.57±7.91  | 19.95±2.03 | 17.31±3.40 | 17.44±0.34 | 17.85±1.15 |
|          | PGD     | 210/130               | 71.13±0.72 | 50.15±1.88 | 24.90±3.30 | 31.26±4.51  | 20.65±1.23 | 17.33±3.40 | 17.39±0.33 | 17.67±0.90 |
|          | PGD     | 230/150               | 71.13±0.85 | 36.03±2.13 | 28.16±3.98 | 35.71±4.84  | 21.36±2.23 | 17.31±3.40 | 17.38±0.34 | 17.75±1.28 |
|          | TDGIA   | 110/30                | 72.48±0.67 | 72.30±0.82 | 24.30±1.73 | 26.31±1.64  | 23.85±1.25 | 19.26±3.59 | 20.24±1.97 | 18.80±2.45 |
|          | TDGIA   | 130/50                | 72.26±0.72 | 72.32±0.69 | 27.34±2.72 | 32.0±2.62   | 23.37±1.07 | 18.15±1.68 | 21.16±2.68 | 20.08±2.78 |
|          | TDGIA   | 150/70                | 72.15±0.58 | 72.41±0.86 | 26.41±1.68 | 27.39±1.25  | 22.21±1.82 | 19.26±3.08 | 19.54±2.25 | 20.39±2.18 |
|          | TDGIA   | 170/90                | 72.41±0.64 | 72.06±0.98 | 21.63±1.18 | 25.25±1.94  | 20.05±1.46 | 18.16±2.49 | 19.09±2.28 | 19.37±2.30 |
|          | TDGIA   | 190/110               | 72.80±0.85 | 72.39±0.65 | 24.56±2.34 | 26.97±2.04  | 19.94±1.44 | 18.04±1.59 | 20.13±1.72 | 21.53±2.92 |
|          | TDGIA   | 210/130               | 72.35±0.42 | 71.78±0.82 | 24.58±3.51 | 24.49±1.19  | 21.46±1.93 | 18.49±2.13 | 20.16±2.43 | 18.46±1.72 |
|          | TDGIA   | 230/150               | 71.77±0.71 | 71.76±0.81 | 19.01±2.74 | 28.85±1.65  | 19.28±1.72 | 18.97±2.65 | 20.76±4.0  | 18.76±2.02 |
|          | MetaGIA | 110/30                | 72.22±1.38 | 72.43±0.67 | 22.48±2.28 | 20.95±2.29  | 30.29±4.58 | 21.77±2.91 | 22.18±2.88 | 18.72±0.27 |
|          | MetaGIA | 130/50                | 72.18±1.17 | 71.96±0.86 | 23.28±4.32 | 19.81±1.44  | 25.91±3.65 | 20.44±2.63 | 20.67±2.39 | 18.16±0.16 |
|          | MetaGIA | 150/70                | 71.83±0.98 | 71.05±0.93 | 24.68±4.59 | 19.72±1.82  | 26.82±2.76 | 19.64±2.85 | 20.24±3.80 | 18.19±0.07 |
|          | MetaGIA | 170/90                | 71.76±1.22 | 68.81±0.77 | 22.48±2.22 | 20.80±1.97  | 29.07±8.81 | 18.82±2.68 | 19.20±2.75 | 18.27±0.0  |
|          | MetaGIA | 190/110               | 71.85±0.60 | 64.54±0.78 | 23.29±4.28 | 22.91±2.98  | 26.28±2.84 | 18.59±2.01 | 18.70±2.24 | 18.28±0.03 |
|          | MetaGIA | 210/130               | 71.39±0.72 | 56.44±2.42 | 22.56±3.09 | 24.97±2.53  | 26.84±3.41 | 18.71±2.64 | 18.61±2.09 | 18.27±0.0  |
|          | MetaGIA | 230/150               | 71.52±0.65 | 13.48±3.49 | 24.13±3.08 | 48.37±2.85  | 26.81±3.78 | 18.58±1.83 | 18.59±2.06 | 18.27±0.0  |

Table S5: Node classification accuracy (%) under **modification, poisoning** targeted attack (Nettack) in **transductive** learning. The best and the second-best result for each criterion are highlighted in **red** and **blue** respectively.

| Dataset  | Ptb | HANG              | HANG-quad         | GraphCON   | GraphCurv  | GRAND             | GAT               | GCN        | RGCN       | GCN-SVD           | Pro-GNN           |
|----------|-----|-------------------|-------------------|------------|------------|-------------------|-------------------|------------|------------|-------------------|-------------------|
| Cora     | 1   | 75.54±3.10        | 76.99±3.16        | 73.25±3.91 | 63.73±2.25 | <b>80.12±1.81</b> | 76.04±2.08        | 75.06±1.02 | 76.75±1.71 | 77.23±1.82        | <b>81.81±1.66</b> |
|          | 2   | 73.73±3.64        | <b>76.51±2.60</b> | 67.83±3.0  | 62.41±2.94 | <b>76.27±1.79</b> | 70.24±1.43        | 70.60±1.10 | 70.96±1.14 | 72.53±1.60        | 75.90±1.43        |
|          | 3   | 68.43±4.23        | <b>73.13±2.85</b> | 68.19±2.10 | 61.20±3.08 | <b>70.48±3.74</b> | 65.54±1.34        | 67.95±1.72 | 66.51±1.60 | 66.75±1.54        | 70.12±1.93        |
|          | 4   | <b>66.02±2.21</b> | <b>72.53±2.14</b> | 57.59±2.34 | 56.51±2.72 | 65.30±2.40        | 61.69±0.90        | 61.57±1.47 | 59.28±2.68 | 60.72±1.63        | 65.66±1.35        |
|          | 5   | 60.12±3.63        | <b>68.80±2.55</b> | 55.30±4.77 | 51.93±2.77 | 57.95±2.38        | 58.31±2.03        | 55.54±1.66 | 55.30±1.66 | 57.71±1.82        | <b>64.34±1.72</b> |
| Citeseer | 1   | 76.03±3.51        | 79.05±1.38        | 76.03±3.44 | 68.89±2.67 | 80.0±1.05         | <b>81.27±1.38</b> | 78.41±1.62 | 78.25±0.73 | 80.16±2.04        | <b>81.75±0.79</b> |
|          | 2   | 74.76±2.50        | 77.94±2.29        | 68.73±6.62 | 67.62±3.11 | 74.28±7.47        | 77.43±4.89        | 74.92±3.54 | 75.40±2.04 | <b>79.84±0.73</b> | <b>81.27±0.95</b> |
|          | 3   | 74.76±2.18        | <b>77.14±2.48</b> | 60.47±5.24 | 60.63±3.87 | 57.14±9.28        | 60.85±2.99        | 63.97±3.69 | 60.31±1.19 | 77.14±2.86        | <b>79.68±1.98</b> |
|          | 4   | 73.49±3.02        | <b>78.41±1.62</b> | 55.55±6.23 | 53.17±6.48 | 59.84±2.75        | 61.59±4.64        | 55.40±2.60 | 55.49±1.75 | 69.52±3.31        | <b>77.78±2.84</b> |
|          | 5   | <b>72.06±3.56</b> | <b>73.49±3.48</b> | 51.75±2.77 | 48.73±4.60 | 48.41±8.10        | 55.56±6.28        | 47.62±5.17 | 47.44±2.01 | 69.21±2.48        | 71.27±4.99        |
| Polblogs | 1   | 97.06±0.66        | <b>97.37±0.37</b> | 87.07±1.35 | 68.17±3.25 | 96.41±0.87        | 97.22±0.25        | 96.83±0.17 | 97.00±0.07 | <b>97.56±0.20</b> | 96.83±0.06        |
|          | 2   | 96.39±1.16        | 96.89±0.16        | 82.92±1.53 | 65.48±2.85 | 92.93±4.21        | 96.11±0.65        | 95.61±0.20 | 95.87±0.23 | <b>97.12±0.09</b> | <b>97.17±0.12</b> |
|          | 3   | 96.02±0.93        | <b>96.65±0.15</b> | 80.76±0.74 | 62.59±1.99 | 91.96±4.22        | 95.81±0.56        | 95.41±0.18 | 95.59±0.27 | 96.61±0.14        | <b>96.93±0.12</b> |
|          | 4   | 93.81±3.86        | <b>96.26±0.53</b> | 77.46±1.59 | 58.68±0.40 | 86.83±6.28        | 94.80±0.66        | 94.24±0.24 | 94.37±0.26 | 96.17±0.19        | <b>96.89±0.16</b> |
|          | 5   | 91.65±4.67        | <b>95.91±0.33</b> | 75.30±2.71 | 59.02±3.19 | 83.69±5.88        | 93.28±1.43        | 93.00±0.48 | 93.20±0.43 | 95.13±0.25        | <b>96.13±0.25</b> |

## S2.6 ODE solvers

The results from various ODE solvers are depicted in Table S6. We consider fixed-step Euler and RK4, along with adaptive-step Dopri5, from [37], and Symplectic-Euler from [28]. The Symplectic-Euler method, being inherently energy-conserving, is particularly suited for preserving the dynamic properties of Hamiltonian systems over long times. Our observations suggest that while the choice of solver slightly influences the clean accuracy for some models, their performance under attack conditions remains fairly consistent. Consequently, there was no specific optimization for solver selection during our experiments. For computational efficiency, we opted for the Euler ODE solver in all experiments presented in the main paper.

Table S6: Node classification accuracy (%) on graph **injection, evasion, non-targeted, black-box** attack in **inductive** learning of Citeseer dataset.

| Attack  | Solver           | HANG       | HANG-quad  | GraphCON   | GraphCurv  | GRAND      |
|---------|------------------|------------|------------|------------|------------|------------|
| clean   | Euler            | 74.11±0.62 | 71.85±0.48 | 74.84±0.49 | 69.62±0.56 | 74.98±0.45 |
|         | rk4              | 73.71±1.58 | 72.63±0.56 | 75.80±0.38 | 74.46±0.68 | 75.32±0.78 |
|         | symplectic euler | 71.35±1.91 | 72.80±0.64 | 75.43±0.62 | 69.87±0.78 | 75.70±0.71 |
|         | dopri5           | 75.20±0.93 | –          | 76.24±0.76 | 74.63±0.70 | 75.14±0.56 |
| PGD     | Euler            | 72.31±1.16 | 71.07±0.41 | 40.56±0.36 | 55.67±5.35 | 36.68±1.05 |
|         | rk4              | 71.85±2.04 | 72.38±0.52 | 41.26±0.89 | 41.51±1.76 | 41.21±1.57 |
|         | symplectic euler | 70.57±1.74 | 72.46±0.53 | 40.87±2.62 | 49.09±7.82 | 39.72±1.54 |
|         | dopri5           | 73.59±0.38 | –          | 42.20±2.21 | 40.07±0.87 | 40.53±1.14 |
| TDGIA   | Euler            | 72.12±0.52 | 71.69±0.40 | 36.67±1.25 | 34.17±4.68 | 36.67±1.25 |
|         | rk4              | 71.03±1.64 | 72.85±0.78 | 36.19±2.03 | 37.90±1.70 | 34.21±1.63 |
|         | symplectic euler | 71.79±2.03 | 73.31±0.58 | 35.32±1.78 | 28.40±0.91 | 35.12±1.62 |
|         | dopri5           | 72.14±0.71 | –          | 38.04±1.71 | 40.63±1.60 | 34.39±1.19 |
| MetaGIA | Euler            | 72.92±0.66 | 71.60±0.48 | 48.36±2.12 | 45.60±4.31 | 46.23±2.01 |
|         | rk4              | 70.25±1.45 | 72.39±0.61 | 42.57±1.09 | 43.38±0.88 | 41.01±0.92 |
|         | symplectic euler | 71.56±1.07 | 72.86±0.72 | 42.57±1.09 | 44.72±6.28 | 41.0±0.64  |
|         | dopri5           | 71.83±1.26 | –          | 42.61±0.57 | 42.93±0.61 | 41.74±0.69 |

## S2.7 Computation Time

The average inference time and model size for different models used in our study are outlined in Table S7. This analysis is performed using the Cora dataset, with all graph PDE models employing the Euler Solver, an integration time of 3, and a step size of 1. Additionally, for fair comparison, all baseline models are configured with 3 layers. Upon examination, it is observed that our HANG and HANG-quad models necessitate more inference time compared to other baseline models. This is primarily due to the requirement in these models to initially calculate the derivative. However, when compared to other defense models, such as GCNGUAD, our models are still more efficient, thus validating their practical utility.

Table S7: Average inference time and model size

| Model               | HANG  | HANG-quad | GraphCON | GraphCurv | GRAND | GAT   | GraphSAGE | GCN   | GCNGUARD | RGCN  |
|---------------------|-------|-----------|----------|-----------|-------|-------|-----------|-------|----------|-------|
| Inference Time (ms) | 17.16 | 14.41     | 2.60     | 6.18      | 2.25  | 4.13  | 3.85      | 3.93  | 95.90    | 2.50  |
| Model Size(MB)      | 0.895 | 0.936     | 0.732    | 0.734     | 0.732 | 0.381 | 0.380     | 0.380 | 0.380    | 0.735 |

## S3 Proof of Theorem S1

In the main paper, the statement of Theorem S1 contains some superfluous assumptions, which we revise herein, supplying proofs as required.

**Theorem S1.** *Given that  $\mathbf{A}_G$  is right stochastic, GRAND demonstrates both BIBO and Lyapunov stability for any  $\alpha \geq 1$ . Moreover, if  $\alpha > 1$ , it achieves asymptotic stability under any perturbation. For  $\alpha = 1$ , if we take the normalized adjacent matrix  $\mathbf{A}_G = \mathbf{W}\mathbf{D}^{-1}$ , where  $\mathbf{D}$  is the diagonal node degree matrix, GRAND conserves a quantity that can be interpreted as energy. Additionally, when  $\alpha = 1$ , it attains asymptotic stability if the graph is aperiodic and strongly connected, and if the perturbation on  $\mathbf{X}(0)$  preserves unchanged column summations.*

138 *Proof.* Recall that

$$\frac{d\mathbf{X}(t)}{dt} = (\mathbf{A}_G(\mathbf{X}(t)) - \alpha\mathbf{I})\mathbf{X}(t) := \bar{\mathbf{A}}_G(\mathbf{X}(t))\mathbf{X}(t), \quad (\text{S1})$$

139 where  $\mathbf{A}_G$  is right stochastic and  $\alpha \geq 1$ .

140 Without loss of generality, we assume  $\mathbf{X} \in \mathbb{R}^{|\mathcal{V}| \times 1}$  since the results can be generalized to  $\mathbf{X} \in \mathbb{R}^{|\mathcal{V}| \times r}$   
141 component-wise.

142 As  $\mathbf{A}_G(\mathbf{X}(t))$  is consistently right-stochastic and  $\alpha \geq 1$ , the eigenvalues of  $\bar{\mathbf{A}}_G(\mathbf{X}(t)) =$   
143  $\mathbf{A}_G(\mathbf{X}(t)) - \alpha\mathbf{I}$  always have *non-positive real parts* [39][Theorem 8.1.22]. We define a Lyapunov  
144 function as  $V(\mathbf{X}(t)) = \|\mathbf{X}(t)\|^2 := \mathbf{X}(t)^\top \mathbf{X}(t)$  where  $\|\cdot\|$  is the euclidean norm.

145 Take the derivative of  $V$  with respect to time, we have

$$\dot{V}(\mathbf{X}(t)) = \mathbf{X}^\top(t)\dot{\mathbf{X}}(t) + \dot{\mathbf{X}}^\top(t)\mathbf{X}(t) = \mathbf{X}^\top(t) \left( \bar{\mathbf{A}}_G(\mathbf{X}(t)) + \bar{\mathbf{A}}_G^\top(\mathbf{X}(t)) \right) \mathbf{X}(t) \quad (\text{S2})$$

146 Since the eigenvalues of  $\bar{\mathbf{A}}_G(\mathbf{X}(t))$  possess negative real parts, we infer that  $\dot{V}(\mathbf{X}(t)) \leq 0$ . This  
147 shows that  $V(\mathbf{X}(t))$  is non-increasing over time, thereby implying that  $\mathbf{X}(t)$  remains bounded. In  
148 effect, we also prove Lyapunov stability concerning the equilibrium point  $\mathbf{X} = 0$ .

149 To prove asymptotic stability for the equilibrium point  $\mathbf{X} = 0$  when  $\alpha > 1$ , we need to show that the  
150 system not only remains bounded but also approaches  $\mathbf{X} = 0$  as  $t \rightarrow \infty$ . This is indicated by the fact  
151 that the eigenvalues of  $\bar{\mathbf{A}}_G(\mathbf{X}(t))$  have negative real parts when  $\alpha > 1$ , which means  $\dot{V}(\mathbf{X}(t)) < 0$   
152 unless  $\mathbf{X}(t) = 0$ . This signifies that  $V(\mathbf{X}(t))$  strictly declines over time unless  $\mathbf{X}(t) = 0$ , thereby  
153 showing that the system will converge to  $\mathbf{X} = 0$  as  $t \rightarrow \infty$ .

154 We next show that if  $\mathbf{A}_G$  is chosen as  $\mathbf{W}\mathbf{D}^{-1}$ , GRAND conserves a quantity that can be regarded as  
155 energy. The “energy” is the sum of the elements of  $\mathbf{X}(t)$ . This quantity is conserved if  $\mathbf{1}^\top \bar{\mathbf{A}}_G = \mathbf{0}^\top$ ,  
156 where  $\mathbf{1}$  is an all-ones vector, which is evident given that  $\mathbf{W}\mathbf{D}^{-1}$  is column stochastic.

157 Finally, we aim to prove that GRAND is asymptotic stable concerning a specified equilibrium vector  
158 when  $\alpha = 1$  and the graph is aperiodic and strongly connected.

159 Consider the matrix  $\mathbf{W}\mathbf{D}^{-1}$ ; given that  $\mathbf{W}\mathbf{D}^{-1}$  is column stochastic and the graph is strongly  
160 connected and aperiodic, the Perron-Frobenius theorem as stated in [39][Lemma 8.4.3., Theorem  
161 8.4.4] confirms that the value 1 is the unique eigenvalue equal to the spectral radius. This infers  
162 that the modified adjacency matrix  $\bar{\mathbf{A}}_G = \mathbf{W}\mathbf{D}^{-1} - \mathbf{I}$  has an eigenvalue of 0, with the rest of the  
163 eigenvalues having *strictly negative real parts*. Representing  $\bar{\mathbf{A}}_G = \mathbf{S}\mathbf{J}\mathbf{S}^{-1}$  as the Jordan canonical  
164 form, we conclude that  $\mathbf{J}$  contains a block of only a single 0 (for simplicity, we assume 0 is the first  
165 Jordan block).

166 As our system of equations is a linear time-invariant ordinary differential equation (ODE), the solution  
167 to (S1) can be expressed as:

$$\begin{aligned} \mathbf{X}(t) &= e^{\bar{\mathbf{A}}_G t} \mathbf{X}(0) \\ &= \mathbf{S} e^{\mathbf{J} t} \mathbf{S}^{-1} \mathbf{X}(0) \end{aligned} \quad (\text{S3})$$

168 Further, the Jordan canonical form of  $\mathbf{W}\mathbf{D}^{-1}$  is represented as  $\mathbf{S}\bar{\mathbf{J}}\mathbf{S}^{-1}$  where  $\bar{\mathbf{J}} = \mathbf{J} + \mathbf{I}$  with the  
169 first Jordan block being 1 and the rest having eigenvalues *strictly less than* 1. Based on [39][Theorem  
170 3.2.5.2.], we observe that  $\lim_{k \rightarrow \infty} (\mathbf{W}\mathbf{D}^{-1})^k = \lim_{k \rightarrow \infty} \mathbf{S}\bar{\mathbf{J}}^k \mathbf{S}^{-1} = \mathbf{S}\mathbf{\Lambda}\mathbf{S}^{-1}$ , where  $\mathbf{\Lambda}$  is a diagonal  
171 matrix with the first element as 1 and all the others as 0:

$$\mathbf{\Lambda} = \begin{pmatrix} 1 & & & \\ & 0 & & \\ & & \ddots & \\ & & & 0 \end{pmatrix}$$

172 Since  $\lim_{k \rightarrow \infty} (\mathbf{W}\mathbf{D}^{-1})^k$  maintains its column stochasticity and the rank of  $\mathbf{S}\mathbf{\Lambda}\mathbf{S}^{-1}$  is 1, we deduce  
173 that the first row of  $\mathbf{S}^{-1}$  is  $a\mathbf{1}^\top$  with  $a$  being a scalar and  $\mathbf{1}$  an all-ones vector. According to [39][3.2.2],  
174 it follows that

$$\lim_{t \rightarrow 0} \mathbf{X}(t) = \lim_{t \rightarrow 0} \mathbf{S} e^{\mathbf{J} t} \mathbf{S}^{-1} \mathbf{X}(0) = \mathbf{S}\mathbf{\Lambda}\mathbf{S}^{-1} \mathbf{X}(0) \quad (\text{S4})$$

175 If  $s := \mathbf{1}^\top \mathbf{X}(0)$  remains constant, we have that  $\lim_{t \rightarrow \infty} \mathbf{X}(t) = sas$  where  $s$  is the first column of  
 176  $\mathbf{S}$ . We thus conclude that if the perturbation on  $\mathbf{X}(0)$  maintains the column summations, i.e. the  
 177 “energy”, unchanged, the asymptotic convergence to the equilibrium vector  $sas$  remains unaffected.  
 178 The proof is now complete.  $\square$

## 179 S4 Example 1

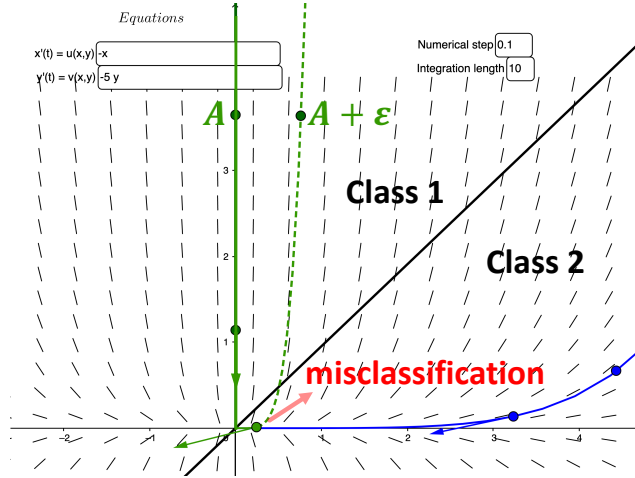

Figure S1: Lyapunov stability and adversarial robustness

180 We provide here an example to demonstrate our claim: consider the Lyapunov stable ODE

$$\dot{\mathbf{x}}(t) = \begin{pmatrix} -1 & 0 \\ 0 & -5 \end{pmatrix} \mathbf{x}(t) \quad (\text{S5})$$

181 with initial condition  $\mathbf{x}(0) = [x_1(0), x_2(0)]^\top$ . The solution to this ODE is given by  $\mathbf{x}(t) =$   
 182  $x_1(0)e^{-t}[1, 0]^\top + x_2(0)e^{-5t}[0, 1]^\top$ . For all initial points in  $\mathbb{R}^2$ , we have  $\mathbf{x}(t) \rightarrow \mathbf{0}$  as  $t \rightarrow \infty$ .  
 183 Furthermore, as  $t \rightarrow \infty$ , the trajectory  $\mathbf{x}(t)$  for any initial point is approximately parallel to the x-axis.  
 184 We draw the phase plane in Fig. S1.

185 Assume that the points on the upper half y-axis belongs to class 1 while we have a linear classifier that  
 186 separates class 1 and class 2 as shown in Fig. S1. We observe that for the initial point  $A$  belonging to  
 187 class 1, the solution from a small perturbed initial point  $A + \epsilon$  is misclassified as class 2 for a large  
 188 enough  $t$  for any linear classifier. We see from this example that Lyapunov stability does not imply  
 189 adversarial robustness in graph neural diffusion models.

## 190 S5 Complete Algorithm Summary

191 We present the complete algorithm of HANG in Algorithm 1, which unfortunately had been delayed  
 192 in its inclusion within the main paper due to space constraints.

---

**Algorithm 1:** Graph Node Embedding Learning with HANG

---

- 1 **Initialization:** Initialize the network modules including Hamiltonian function network  $H_{\text{net}}$ , the raw node features compressor network FC, and the final classifier.
  - 2 **I. Training:**
  - 3 **for**  $Epoch$  1 **to**  $N$  **do**
  - 4   1) Perform the following to obtain the embedding  $\mathbf{q}_k(T)$  for each node  $k$ :
  - 5   **Input:**  $\mathcal{G} = (\mathcal{V}, \mathcal{E})$  with raw node features
  - 6   Apply FC to compress raw features for each node and get  $\{(\mathbf{q}_k(0), \mathbf{p}_k(0))\}_{k=1}^{|\mathcal{V}|}$ . Here, we divide the  $2r$  dimensions into two equal segments. The first half functions as the feature vector  $\mathbf{q}_k(0) = (q_k^1, \dots, q_k^r)$ , while the second half acts as “momentum” vectors  $\mathbf{p}_k(0) = (p_k^1, \dots, p_k^r)$  that guide system evolution. For simplification, in code implementation, we set the output feature dimension of the compressor FC as  $r$  and designate  $\mathbf{p}_k(0) = \mathbf{q}_k(0)$ .
  - 7   2) To better express the evolution dynamics mathematically, concatenate and relabel the node features as:
$$\begin{aligned} q(0) &= (q^1(0), \dots, q^{r|\mathcal{V}|}(0)) = (\mathbf{q}_1(0), \dots, \mathbf{q}_{|\mathcal{V}|}(0)) . \\ p(0) &= (p_1(0), \dots, p_{r|\mathcal{V}|}(0)) = (\mathbf{p}_1(0), \dots, \mathbf{p}_{|\mathcal{V}|}(0)) , \end{aligned} \quad (S6)$$
  - 193   Note that in the actual code implementation, the concatenation of node features is not necessary as  $H_{\text{net}}$  is realized as either (11) or (12). The concatenate operation is only for mathematical formulation.
  - 8   3) The trajectory of feature evolution is modelled as per the following canonical Hamilton’s equations:
$$\dot{q}(t) = \frac{\partial H_{\text{net}}}{\partial p}, \quad \dot{p}(t) = -\frac{\partial H_{\text{net}}}{\partial q}, \quad (S7)$$
  - 9   with the initial features  $(q(0), p(0)) \in \mathbb{R}^{2r|\mathcal{V}|}$ . Various ODE solvers as provided by [37] and the symplectic-euler solver from [28] can be employed to solve (S7). We refer readers to Section S2.6 for more details.
  - 10   4) Acquire the evolved features at time  $T$  as  $q(T)$ , which is then decompressed into individual node features  $\mathbf{q}_k(T)_{k=1}^{|\mathcal{V}|}$  for further utilization.
  - 11   5) Utilize backpropagation to minimize the cross-entropy loss for node classification.
  - 12   6) Perform validation over the validation split.
  - 13   7) Save the model parameters.
  - 14 **II. Testing:**
  - 15 Load the model from the best validation epoch and perform **Step I.1-4).** to obtain the final feature embedding over the test split. Perform node classification.
- 

## Limitations

While our work on graph neural flows presents promising advancements in enhancing adversarial robustness of GNNs using Hamiltonian-inspired neural ODEs, it is not without limitations. As we demonstrated in the paper, the notions of stability borrowed from dynamical systems, such as BIBO stability and Lyapunov stability, do not always guarantee adversarial robustness. Our finding that energy-conservative Hamiltonian graph flows improve robustness is only one facet of the broader landscape of potential stability measures. It is possible that other notions of stability, not covered in this work, could yield additional insights into adversarial robustness. Our current Hamiltonian graph neural flows do not explicitly account for quasi-periodic motions in the graph dynamics. The Kolmogorov-Arnold-Moser (KAM) theory, a foundational theory in Hamiltonian dynamics, is renowned for its analysis of persistence of quasi-periodic motions under small perturbations in Hamiltonian dynamical systems. While the energy-conserving nature of our Hamiltonian-inspired model inherently offers some level of robustness to perturbations, an explicit incorporation of KAM theory could potentially further improve the robustness, particularly in the face of quasi-periodic



adversarial attacks. However, this is a complex task due to the high dimensionality of typical graph datasets and the intricacies involved in approximating quasi-periodic dynamics.

## Broader Impact

This research, centered on enhancing adversarial robustness in graph neural networks (GNNs), carries implications for various sectors, such as social media networks, sensor networks, and chemistry. By improving the resilience of GNNs, we can boost the reliability of AI-driven systems, contributing to greater efficiency, productivity, and cost-effectiveness. The shift towards automation may displace certain jobs, raising ethical concerns about income disparity and job security. Moreover, while our models enhance robustness, potential system failures can still occur, with impacts varying based on the application. Lastly, the robustness conferred might be exploited maliciously. Our work underscores the importance of diligent oversight, equitable technology implementation, and continuous innovation in the development of AI technologies.

## References

- [S-1] J. Chen, Y. Wu, X. Xu, Y. Chen, H. Zheng, and Q. Xuan, “Fast gradient attack on network embedding,” *ArXiv*, 2018.
- [S-2] M. Waniek, T. P. Michalak, M. J. Wooldridge, and T. Rahwan, “Hiding individuals and communities in a social network,” *Nature Human Behaviour*, vol. 2, no. 1, pp. 139–147, 2018.
- [S-3] J. Du, S. Zhang, G. Wu, J. M. F. Moura, and S. Kar, “Topology adaptive graph convolutional networks,” *ArXiv*, vol. abs/1710.10370, 2017.
- [S-4] D. Zügner, A. Akbarnejad, and S. Günnemann, “Adversarial attacks on neural networks for graph data,” in *Proc. Int. Conf. Knowl. Discovery Data Mining*, 2018.
- [S-5] D. Zügner and S. Günnemann, “Adversarial attacks on graph neural networks via meta learning,” in *Proc. Int. Conf. Learn. Representations*, 2019.
- [S-6] Y. Ma, S. Wang, T. Derr, L. Wu, and J. Tang, “Graph adversarial attack via rewiring,” in *Proc. Int. Conf. Knowl. Discovery Data Mining*, 2021, p. 1161–1169.
- [S-7] Y. Sun, S. Wang, X. Tang, T.-Y. Hsieh, and V. Honavar, “Adversarial attacks on graph neural networks via node injections: A hierarchical reinforcement learning approach,” in *Proc. Web Conf.*, 2020, p. 673–683.
- [S-8] X. Wan, H. Kenlay, B. Ru, A. Blaas, M. A. Osborne, and X. Dong, “Adversarial attacks on graph classification via bayesian optimisation,” *arXiv preprint arXiv:2111.02842*, 2021.
- [S-9] S. Geisler, T. Schmidt, H. Şirin, D. Zügner, A. Bojchevski, and S. Günnemann, “Robustness of graph neural networks at scale,” *Advances Neural Inf. Process. Syst.*, vol. 34, pp. 7637–7649, 2021.
- [S-10] J. Ma, J. Deng, and Q. Mei, “Adversarial attack on graph neural networks as an influence maximization problem,” in *ACM International Conference on Web Search and Data Mining*, 2022, pp. 675–685.
- [S-11] B. Finkelshtein, C. Baskin, E. Zheltonozhskii, and U. Alon, “Single-node attacks for fooling graph neural networks,” *Neurocomputing*, vol. 513, pp. 1–12, 2022.
- [S-12] J. Wang, M. Luo, F. Suya, J. Li, Z. Yang, and Q. Zheng, “Scalable attack on graph data by injecting vicious nodes,” *Data Mining Knowl. Discovery*, pp. 1 – 27, 2020.
- [S-13] Q. Zheng, Y. Fei, Y. Li, Q. Liu, M. Hu, and Q. Sun. Kdd cup 2020 ml track 2 adversarial attacks and defense on academic graph 1st place solution. Accessed: May 1, 2022. [Online]. Available: [https://github.com/Stanislas0/KDD\\_CUP\\_2020\\_MLTrack2\\_SPEIT](https://github.com/Stanislas0/KDD_CUP_2020_MLTrack2_SPEIT)
- [S-14] X. Zou, Q. Zheng, Y. Dong, X. Guan, E. Kharlamov, J. Lu, and J. Tang, “Tdgia: Effective injection attacks on graph neural networks,” in *Proc. Int. Conf. Knowl. Discovery Data Mining*, 2021, p. 2461–2471.
- [S-15] H. Hussain, M. Cao, S. Sikdar, D. Helic, E. Lex, M. Strohmaier, and R. Kern, “Adversarial inter-group link injection degrades the fairness of graph neural networks,” *arXiv preprint arXiv:2209.05957*, 2022.

- [S-16] D. Zhu, Z. Zhang, P. Cui, and W. Zhu, “Robust graph convolutional networks against adversarial attacks,” in *Proc. Int. Conf. Knowl. Discovery Data Mining*, 2019, p. 1399–1407.
- [S-17] W. Feng, J. Zhang, Y. Dong, Y. Han, H. Luan, Q. Xu, Q. Yang, E. Kharlamov, and J. Tang, “Graph random neural networks for semi-supervised learning on graphs,” in *Proc. Advances Neural Inf. Process. Syst.*, 2020.
- [S-18] W. Jin, Y. Ma, X. Liu, X. Tang, S. Wang, and J. Tang, “Graph structure learning for robust graph neural networks,” in *Proc. Int. Conf. Knowl. Discovery Data Mining*, 2020, p. 66–74.
- [S-19] X. Gao, W. Hu, and Z. Guo, “Exploring structure-adaptive graph learning for robust semi-supervised classification,” in *2020 IEEE International Conference on Multimedia and Expo (ICME)*. IEEE, 2020, pp. 1–6.
- [S-20] T. Zhao, Y. Liu, L. Neves, O. Woodford, M. Jiang, and N. Shah, “Data augmentation for graph neural networks,” in *Proceedings of the AAAI Conference on Artificial Intelligence*, vol. 35, no. 12, 2021, pp. 11 015–11 023.
- [S-21] K. Li, Y. Liu, X. Ao, J. Chi, J. Feng, H. Yang, and Q. He, “Reliable representations make a stronger defender: Unsupervised structure refinement for robust gnn,” in *Proc. Int. Conf. Knowl. Discovery Data Mining*, 2022, pp. 925–935.
- [S-22] B. Runwal, S. Kumar *et al.*, “Robust graph neural networks using weighted graph laplacian,” *arXiv preprint arXiv:2208.01853*, 2022.
- [S-23] N. Entezari, S. A. Al-Sayouri, A. Darvishzadeh, and E. E. Papalexakis, “All you need is low (rank): Defending against adversarial attacks on graphs,” in *Proc. Int. Conf. Web Search Data Mining*, 2020, p. 169–177.
- [S-24] X. Zhang and M. Zitnik, “Gnn-guard: Defending graph neural networks against adversarial attacks,” in *Proc. Advances Neural Inf. Process. Syst.*, 2020.
- [S-25] B. P. Chamberlain, J. Rowbottom, M. Goronova, S. Webb, E. Rossi, and M. M. Bronstein, “Grand: Graph neural diffusion,” in *Proc. Int. Conf. Mach. Learn.*, 2021.
- [S-26] M. Thorpe, T. M. Nguyen, H. Xia, T. Strohmer, A. Bertozzi, S. Osher, and B. Wang, “Grand++: Graph neural diffusion with a source term,” in *Proc. Int. Conf. Learn. Representations*, 2021.
- [S-27] B. P. Chamberlain, J. Rowbottom, D. Eynard, F. Di Giovanni, D. Xiaowen, and M. M. Bronstein, “Beltrami flow and neural diffusion on graphs,” in *Advances Neural Inf. Process. Syst.*, 2021.
- [S-28] T. K. Rusch, B. P. Chamberlain, J. Rowbottom, S. Mishra, and M. M. Bronstein, “Graph-coupled oscillator networks,” in *Proc. Int. Conf. Mach. Learn.*, 2022.
- [S-29] Y. Song, Q. Kang, S. Wang, K. Zhao, and W. P. Tay, “On the robustness of graph neural diffusion to topology perturbations,” in *Advances Neural Inf. Process. Syst.*, New Orleans, USA, Nov. 2022.
- [S-30] S. Greydanus, M. Dzamba, and J. Yosinski, “Hamiltonian neural networks,” in *Advances Neural Inf. Process. Syst.*, 2019.
- [S-31] Y. D. Zhong, B. Dey, and A. Chakraborty, “Symplectic ode-net: Learning hamiltonian dynamics with control,” in *Proc. Int. Conf. Learn. Representations*, 2020.
- [S-32] Y. Chen, T. Matsubara, and T. Yaguchi, “Neural symplectic form: Learning hamiltonian equations on general coordinate systems,” in *Advances Neural Inf. Process. Syst.*, 2021.
- [S-33] Z. Chen, J. Zhang, M. Arjovsky, and L. Bottou, “Symplectic recurrent neural networks,” in *Proc. Int. Conf. Learn. Representations*, 2020.
- [S-34] A. Choudhary, J. F. Lindner, E. G. Holliday, S. T. Miller, S. Sinha, and W. L. Ditto, “Physics-enhanced neural networks learn order and chaos,” *Physical Review E*, vol. 101, no. 6, p. 062207, 2020.
- [S-35] E. Haber and L. Ruthotto, “Stable architectures for deep neural networks,” *Inverse Problems*, vol. 34, no. 1, pp. 1–23, Dec. 2017.
- [S-36] Y. Chen, H. Yang, Y. Zhang, K. Ma, T. Liu, B. Han, and J. Cheng, “Understanding and improving graph injection attack by promoting unnoticeability,” in *Proc. Int. Conf. Learn. Representations*, 2022.

- 308 [S-37] R. T. Chen, Y. Rubanova, J. Bettencourt, and D. Duvenaud, “Neural ordinary differential  
309 equations,” in *Advances Neural Inf. Process. Syst.*, 2018.
- 310 [S-38] W. Jin, Y. Ma, X. Liu, X. Tang, S. Wang, and J. Tang, “Graph structure learning for robust  
311 graph neural networks,” in *Proc. Int. Conf. Knowl. Discovery Data Mining*, 2020, pp. 66–74.
- 312 [S-39] R. A. Horn and C. R. Johnson, *Matrix analysis*. New York: Cambridge university press,  
313 2012.
